# Supplementary material for: The Associations of Maternal Health Characteristics, Newborn Metabolite Concentrations, and Child Body Mass Index among US Children in the ECHO Program
Source: MDPI journal article supplement (doi:10.3390/metabo13040510), 2023-04-01
Supplement: s1 [file s1]

**Table S3. Newborn screening metabolite concentrations (n=31) by cohort.**

| Metabolite<br>(umol/L)                                                | Cohort              |                     |                     | p-value <sup>a</sup> |
|-----------------------------------------------------------------------|---------------------|---------------------|---------------------|----------------------|
|                                                                       | INSPIRE             | MARCH               | Healthy Start       |                      |
| <b>Total sample size</b>                                              | <b>1920</b>         | <b>365</b>          | <b>1207</b>         |                      |
| Free carnitine (C0),<br>median (IQR)                                  | 18.13 (14.11-23.30) | 20.07 (14.75-25.04) | 30.50 (24.00-37.70) | <0.001*              |
| Missing, N (%)                                                        | 7 (0)               | 0 (0)               | 1 (0)               |                      |
| <b>Acylcarnitines</b>                                                 |                     |                     |                     |                      |
| Acetylcarnitine (C2),<br>median (IQR)                                 | 21.17 (16.91-27.00) | 21.58 (17.15-27.44) | 25.50 (21.70-30.40) | <0.001*              |
| Missing, N (%)                                                        | 7 (0)               | 0 (0)               | 1 (0)               |                      |
| Propionylcarnitine (C3),<br>median (IQR)                              | 1.43 (1.09-1.85)    | 2.19 (1.66-2.85)    | 1.72 (1.31-2.16)    | <0.001*              |
| Missing, N (%)                                                        | 7 (0)               | 0 (0)               | 1 (0)               |                      |
| Butyrylcarnitine +<br>Isobutyrylcarnitine (C4),<br>median (IQR)       | 0.21 (0.17-0.26)    | 0.21 (0.16-0.29)    | 0.27 (0.20-0.35)    | <0.001*              |
| Missing, N (%)                                                        | 7 (0)               | 0 (0)               | 1 (0)               |                      |
| Isovalerylcarnitine +<br>Methylbutyrylcarnitine<br>(C5), median (IQR) | 0.08 (0.07-0.11)    | 0.09 (0.07-0.12)    | 0.12 (0.09-0.16)    | <0.001*              |
| Missing, N (%)                                                        | 12 (1)              | 0 (0)               | 1 (0)               |                      |
| Tiglylcarnitine (C5:1),<br>N (%)                                      |                     |                     |                     | <0.001*              |
| 0 - <0.01                                                             | 203 (11)            | 72 (20)             | 125 (10)            |                      |

|                                               |                  |                  |                  |         |
|-----------------------------------------------|------------------|------------------|------------------|---------|
| ≥0.01 - <0.02                                 | 1696 (88)        | 286 (78)         | 144 (12)         |         |
| ≥0.02 - <0.03                                 | 13 (1)           | 7 (2)            | 110 (9)          |         |
| ≥0.03                                         | 1 (0)            | 0 (0)            | 827 (69)         |         |
| Missing, N (%)                                | 7 (0)            | 0 (0)            | 1 (0)            |         |
| Hexanoylcarnitine (C6),<br>median (IQR)       | 0.04 (0.04-0.06) | 0.05 (0.04-0.06) | 0.07 (0.06-0.09) | <0.001* |
| Missing, N (%)                                | 7 (0)            | 0 (0)            | 1 (0)            |         |
| Octanoylcarnitine (C8),<br>median (IQR)       | 0.06 (0.05-0.07) | 0.05 (0.04-0.06) | 0.08 (0.06-0.11) | <0.001* |
| Missing, N (%)                                | 7 (0)            | 0 (0)            | 1 (0)            |         |
| Decanoylcarnitine<br>(C10), median (IQR)      | 0.08 (0.06-0.11) | 0.08 (0.06-0.11) | 0.13 (0.10-0.17) | <0.001* |
| Missing, N (%)                                | 7 (0)            | 0 (0)            | 1 (0)            |         |
| Decenoylcarnitine<br>(C10:1), median (IQR)    | 0.05 (0.04-0.06) | 0.04 (0.03-0.05) | 0.07 (0.05-0.10) | <0.001* |
| Missing, N (%)                                | 7 (0)            | 0 (0)            | 1 (0)            |         |
| Decadienoylcarnitine<br>(C10:2), N (%)        |                  |                  |                  | <0.001* |
| 0 - <0.01                                     | 48 (3)           | 69 (19)          | 337 (28)         |         |
| ≥0.01 - <0.02                                 | 1771 (92)        | 288 (79)         | 201 (17)         |         |
| ≥0.02 - <0.03                                 | 90 (5)           | 8 (2)            | 208 (17)         |         |
| ≥0.03                                         | 4 (0)            | 0 (0)            | 460 (38)         |         |
| Missing, N (%)                                | 7 (0)            | 0 (0)            | 1 (0)            |         |
| Tetradecanoylcarnitine<br>(C14), median (IQR) | 0.21 (0.17-0.27) | 0.22 (0.17-0.27) | 0.25 (0.20-0.31) | <0.001* |
| Missing, N (%)                                | 7 (0)            | 0 (0)            | 1 (0)            |         |

|                         |                  |                  |                  |         |
|-------------------------|------------------|------------------|------------------|---------|
| 3-Hydroxytetradecan-    |                  |                  |                  | <0.001* |
| oylcarnitine (C14-OH),  |                  |                  |                  |         |
| N (%)                   |                  |                  |                  |         |
| 0 - <0.01               | 33 (2)           | 9 (2)            | 55 (5)           |         |
| ≥0.01 - <0.02           | 934 (49)         | 141 (39)         | 67 (6)           |         |
| ≥0.02 - <0.03           | 723 (38)         | 153 (42)         | 151 (13)         |         |
| ≥0.03 - <0.04           | 183 (10)         | 43 (12)          | 196 (16)         |         |
| ≥0.04 - <0.05           | 36 (2)           | 16 (4)           | 210 (17)         |         |
| ≥0.05                   | 4 (0)            | 3 (1)            | 527 (44)         |         |
| Missing, N (%)          | 7 (0)            | 0 (0)            | 1 (0)            |         |
| Tetradecenoylcarnitine  | 0.12 (0.09-0.17) | 0.12 (0.08-0.16) | 0.15 (0.11-0.19) | <0.001* |
| (C14:1), median (IQR)   |                  |                  |                  |         |
| Missing, N (%)          | 7 (0)            | 0 (0)            | 1 (0)            |         |
| Palmitoylcarnitine      | 2.81 (2.25-3.45) | 3.56 (2.78-4.19) | 2.87 (2.35-3.43) | <0.001* |
| (C16), median (IQR)     |                  |                  |                  |         |
| Missing, N (%)          | 7 (0)            | 0 (0)            | 1 (0)            |         |
| 3-Hydroxypalmitoylca-   |                  |                  |                  | <0.001* |
| rnitine (C16-OH), N (%) |                  |                  |                  |         |
| 0 - <0.01               | 4 (0)            | 1 (0)            | 51 (4)           |         |
| ≥0.01 - <0.02           | 390 (20)         | 51 (14)          | 47 (4)           |         |
| ≥0.02 - <0.03           | 967 (50)         | 139 (38)         | 194 (16)         |         |
| ≥0.03 - <0.04           | 418 (22)         | 117 (32)         | 260 (22)         |         |
| ≥0.04 - <0.05           | 106 (6)          | 43 (12)          | 231 (19)         |         |
| ≥0.05                   | 28 (1)           | 14 (4)           | 423 (35)         |         |
| Missing, N (%)          | 7 (0)            | 0 (0)            | 1 (0)            |         |

|                                                 |                   |                   |                    |         |
|-------------------------------------------------|-------------------|-------------------|--------------------|---------|
| Palmitoleylcarnitine<br>(C16:1), median (IQR)   | 0.21 (0.16-0.27)  | 0.24 (0.19-0.30)  | 0.21 (0.17-0.27)   | <0.001* |
| Missing, N (%)                                  | 7 (0)             | 0 (0)             | 1 (0)              |         |
| Stearoylcarnitine (C18),<br>median (IQR)        | 0.77 (0.61-0.95)  | 0.86 (0.72-1.03)  | 0.84 (0.68-1.03)   | <0.001* |
| Missing, N (%)                                  | 7 (0)             | 0 (0)             | 1 (0)              |         |
| Oleoylcarnitine (C18:1),<br>median (IQR)        | 1.16 (0.93-1.42)  | 1.22 (0.99-1.44)  | 1.05 (0.87-1.27)   | <0.001* |
| Missing, N (%)                                  | 7 (0)             | 0 (0)             | 1 (0)              |         |
| 3-Hydroxyoleoylcarni-<br>tine (C18:1-OH), N (%) |                   |                   |                    | <0.001* |
| 0 - <0.01                                       | 9 (0)             | 0 (0)             | 141 (12)           |         |
| ≥0.01 - <0.02                                   | 529 (28)          | 83 (23)           | 97 (8)             |         |
| ≥0.02 - <0.03                                   | 1101 (57)         | 212 (58)          | 304 (25)           |         |
| ≥0.03 - <0.04                                   | 251 (13)          | 64 (18)           | 246 (20)           |         |
| ≥0.04                                           | 23 (1)            | 6 (2)             | 418 (35)           |         |
| Missing, N (%)                                  | 7 (0)             | 0 (0)             | 1 (0)              |         |
| Linoleoylcarnitine<br>(C18:2), median (IQR)     | 0.16 (0.12-0.22)  | 0.19 (0.15-0.25)  | 0.16 (0.12-0.21)   | <0.001* |
| Missing, N (%)                                  | 7 (0)             | 0 (0)             | 1 (0)              |         |
| <b>Amino Acids</b>                              |                   |                   |                    |         |
| Arginine (ARG),<br>median (IQR)                 | 8.00 (6.00-11.00) | 8.81 (5.66-12.86) | 12.00 (9.00-16.00) | <0.001* |
| Missing, N (%)                                  | 5 (0)             | 0 (0)             | 1 (0)              |         |
| Argininosuccinate<br>(ASA), median (IQR)        | 0.06 (0.05-0.08)  | 0.15 (0.11-0.21)  | --                 | <0.001* |

|                                   |                        |                        |                        |         |
|-----------------------------------|------------------------|------------------------|------------------------|---------|
| Missing, N (%)                    | 5 (0)                  | 0 (0)                  | 1207 (100)             |         |
| Citrulline (CIT), median (IQR)    | 12.00 (10.00-15.00)    | 12.80 (10.46-15.51)    | 13.00 (11.00-16.00)    | <0.001* |
| Missing, N (%)                    | 5 (0)                  | 0 (0)                  | 1 (0)                  |         |
| Glycine (GLY), median (IQR)       | 383.00 (329.00-443.00) | 518.34 (452.84-595.28) | 480.00 (407.00-564.00) | <0.001* |
| Missing, N (%)                    | 5 (0)                  | 0 (0)                  | 1 (0)                  |         |
| Leucine (LEU), median (IQR)       | 89.00 (77.00-104.00)   | 84.70 (71.01-100.49)   | --                     | <0.001* |
| Missing, N (%)                    | 5 (0)                  | 0 (0)                  | 1207 (100)             |         |
| Methionine (MET), median (IQR)    | 19.00 (16.00-22.00)    | 22.54 (18.52-27.56)    | 25.00 (21.00-30.00)    | <0.001* |
| Missing, N (%)                    | 5 (0)                  | 0 (0)                  | 1 (0)                  |         |
| Ornithine (ORN), median (IQR)     | 66.00 (55.00-81.00)    | 64.20 (53.20-79.51)    | 75.00 (65.00-88.00)    | <0.001* |
| Missing, N (%)                    | 5 (0)                  | 0 (0)                  | 1 (0)                  |         |
| Phenylalanine (PHE), median (IQR) | 49.00 (43.00-55.00)    | 50.22 (43.57-59.22)    | 53.00 (47.00-60.00)    | <0.001* |
| Missing, N (%)                    | 7 (0)                  | 0 (0)                  | 1 (0)                  |         |
| Tyrosine (TYR), median (IQR)      | 78.00 (61.00-99.00)    | 77.20 (62.90-97.33)    | 79.00 (63.25-101.00)   | 0.21    |
| Missing, N (%)                    | 7 (0)                  | 0 (0)                  | 1 (0)                  |         |
| Valine (VAL), median (IQR)        | 85.00 (73.00-101.00)   | 89.28 (76.03-103.77)   | 103.00 (89.00-124.00)  | <0.001* |
| Missing, N (%)                    | 7 (0)                  | 0 (0)                  | 1 (0)                  |         |

---

IQR, interquartile range.

\*P<0.05

<sup>a</sup>P-values for comparisons between cohorts calculated using Kruskal-Wallis or Pearson  $\chi^2$  test, as appropriate.

-- Metabolite not collected.
