# Supplementary material for: The Associations of Maternal Health Characteristics, Newborn Metabolite Concentrations, and Child Body Mass Index among US Children in the ECHO Program
Source: MDPI journal article supplement (doi:10.3390/metabo13040510), 2023-04-01
Supplement: s1 [file s1]

**Table S1. Newborn screening (NBS) metabolites measured in each cohort.**

|                                                 |              | Measurement collected on NBS |       |       |
|-------------------------------------------------|--------------|------------------------------|-------|-------|
|                                                 |              | panel by cohort              |       |       |
| Metabolite Name (units)                         | Metabolite   | Healthy                      |       |       |
|                                                 | Abbreviation | INSPIRE                      | MARCH | Start |
| Free carnitine (umol/L)                         | C0           | X                            | X     | X     |
| <b>Short-chain acylcarnitines (umol/L)</b>      |              |                              |       |       |
| Acetylcarnitine                                 | C2           | X                            | X     | X     |
| Propionylcarnitine                              | C3           | X                            | X     | X     |
| Butyrylcarnitine + Isobutyrylcarnitine          | C4           | X                            | X     | X     |
| Isovalerylcarnitine +<br>Methylbutyrylcarnitine | C5           | X                            | X     | X     |
| Tiglylcarnitine                                 | C5:1         | X                            | X     | X     |
| 3-Hydroxyisovalerylcarnitine                    | C5-OH        |                              | X     |       |
| Glutaryl carnitine                              | C5-DC        |                              | X     |       |
| <b>Medium-chain acylcarnitines (umol/L)</b>     |              |                              |       |       |
| Hexanoylcarnitine                               | C6           | X                            | X     | X     |
| Methylglutaryl carnitine                        | C6-DC        | X                            |       | X     |
| Octanoylcarnitine                               | C8           | X                            | X     | X     |
| Octenoylcarnitine                               | C8:1         |                              | X     | X     |
| Decanoylcarnitine                               | C10          | X                            | X     | X     |

|                                           |          |   |   |   |
|-------------------------------------------|----------|---|---|---|
| Decenoylcarnitine                         | C10:1    | X | X | X |
| Decadienoylcarnitine                      | C10:2    | X | X | X |
| Dodecanoylcarnitine                       | C12      |   | X | X |
| Dodecenoylcarnitine                       | C12:1    |   | X | X |
| <b>Long-chain acylcarnitines (umol/L)</b> |          |   |   |   |
| Tetradecanoylcarnitine                    | C14      | X | X | X |
| 3-Hydroxytetradecanoylcarnitine           | C14-OH   | X | X | X |
| Tetradecenoylcarnitine                    | C14:1    | X | X | X |
| Tetradecadienoylcarnitine                 | C14:2    |   | X | X |
| Palmitoylcarnitine                        | C16      | X | X | X |
| 3-Hydroxypalmitoylcarnitine               | C16-OH   | X | X | X |
| Palmitoleylcarnitine                      | C16:1    | X | X | X |
| 3-Hydroxypalmitoleylcarnitine             | C16:1-OH |   |   | X |
| Heptadecanoylcarnitine                    | C17      |   | X |   |
| Stearoylcarnitine                         | C18      | X | X | X |
| 3-Hydroxystearoylcarnitine                | C18-OH   |   | X | X |
| Oleoylcarnitine                           | C18:1    | X | X | X |
| 3-Hydroxyoleoylcarnitine                  | C18:1-OH | X | X | X |
| Linoleoylcarnitine                        | C18:2    | X | X | X |
| <b>Amino Acids (umol/L)</b>               |          |   |   |   |
| Alanine                                   | ALA      |   |   | X |
| Arginine                                  | ARG      | X | X | X |
| Argininosuccinate                         | ASA      | X | X |   |

|                 |      |           |           |           |
|-----------------|------|-----------|-----------|-----------|
| Citrulline      | CIT  | X         | X         | X         |
| Glycine         | GLY  | X         | X         | X         |
| Leucine         | LEU  | X         | X         |           |
| Methionine      | MET  | X         | X         | X         |
| Ornithine       | ORN  | X         | X         | X         |
| Phenylalanine   | PHE  | X         | X         | X         |
| Proline         | PRO  |           | X         |           |
| Succinylacetone | SUAC | X         |           |           |
| Tyrosine        | TYR  | X         | X         | X         |
| Valine          | VAL  | X         | X         | X         |
| <b>Total</b>    |      | <b>33</b> | <b>40</b> | <b>37</b> |

---
