# Supplementary material for: The Associations of Maternal Health Characteristics, Newborn Metabolite Concentrations, and Child Body Mass Index among US Children in the ECHO Program
Source: MDPI journal article supplement (doi:10.3390/metabo13040510), 2023-04-01
Supplement: s1 [file s1]

**Table S2. Ascertainment of maternal health characteristics by cohort.**

| <b>Maternal health<br/>characteristic</b> | <b>Cohort</b>  |              |                      |
|-------------------------------------------|----------------|--------------|----------------------|
|                                           | <b>INSPIRE</b> | <b>MARCH</b> | <b>Healthy Start</b> |
| Prenatal smoking                          | a              | b            | b                    |
| Pre-pregnancy BMI                         | a              | b            | b                    |
| Education                                 | a              | b            | b                    |
| Occupational status                       | a              | b            | b                    |
| Marital status                            | a              | b            | b                    |
| Age at delivery                           | a              | d            | c                    |
| Asthma                                    | a              | b            | b                    |
| Gestational diabetes                      | a              | d            | c                    |
| Mode of delivery                          | a              | d            | c                    |

a: Ascertained from questionnaires administered at enrollment (infant age ~2 months).

b: Ascertained from questionnaires administered during pregnancy.

c: Ascertained from medical record at delivery.

d: Ascertained from birth certificates.
