# Supplementary material for: The Associations of Maternal Health Characteristics, Newborn Metabolite Concentrations, and Child Body Mass Index among US Children in the ECHO Program
Source: MDPI journal article supplement (doi:10.3390/metabo13040510), 2023-04-01
Supplement: s1 [file s1]

**Table S4. Pre-specified metabolite groups included in stage one of the statistical plan.**

| <b>Metabolite group</b>     | <b>Metabolite name</b>                            |
|-----------------------------|---------------------------------------------------|
| Short-chain acylcarnitines  | Acetylcarnitine (C2)                              |
|                             | Propionylcarnitine (C3)                           |
|                             | Butyrylcarnitine + Isobutyrylcarnitine (C4)       |
|                             | Isovalerylcarnitine + Methylbutyrylcarnitine (C5) |
| Medium-chain acylcarnitines | Hexanoylcarnitine (C6)                            |
|                             | Octanoylcarnitine (C8)                            |
|                             | Decanoylcarnitine (C10)                           |
|                             | Decenoylcarnitine (C10:1)                         |
| Long-chain acylcarnitines   | Tetradecanoylcarnitine (C14)                      |
|                             | Tetradecenoylcarnitine (C14:1)                    |
|                             | Palmitoylcarnitine (C16)                          |
|                             | Palmitoylcarnitine (C16:1)                        |
|                             | Stearoylcarnitine (C18)                           |
|                             | Oleoylecarnitine (C18:1)                          |
|                             | Linoleoylcarnitine (C18:2)                        |
| Amino acids                 | Arginine (ARG)                                    |
|                             | Argininosuccinate (ASA) <sup>a</sup>              |
|                             | Citrulline (CIT)                                  |
|                             | Glycine (GLY)                                     |
|                             | Leucine (LEU) <sup>a</sup>                        |
|                             | Methionine (MET)                                  |

---

Ornithine (ORN)

Phenylalanine (PHE)

Tyrosine (TYR)

Valine (VAL)

---

<sup>a</sup>Metabolite was not collected in replication cohort and, therefore, not included in replication analyses.
