# Supplementary material for: The Associations of Maternal Health Characteristics, Newborn Metabolite Concentrations, and Child Body Mass Index among US Children in the ECHO Program
Source: MDPI journal article supplement (doi:10.3390/metabo13040510), 2023-04-01
Supplement: s1 [file s1]

**Table S5. Comparison of characteristics for MARCH participants with newborn screening (NBS) metabolic data and all MARCH participants.**

|                                 | MARCH participants<br>with NBS data | All MARCH<br>participants | p-value <sup>a</sup> |
|---------------------------------|-------------------------------------|---------------------------|----------------------|
| <b>Sample size</b>              | <b>365</b>                          | <b>947</b>                |                      |
| <b>Maternal characteristics</b> |                                     |                           |                      |
| Prenatal smoking, N (%)         | 41 (11)                             | 104 (11)                  | 1                    |
| Missing, N (%)                  | 47 (13)                             | 129 (14)                  |                      |
| Pre-pregnancy BMI, mean (SD)    | 29 (8)                              | 29 (8)                    | 0.29                 |
| Missing, N (%)                  | 43 (12)                             | 123 (13)                  |                      |
| Education, N (%)                |                                     |                           | 0.60                 |
| <High school                    | 31 (8)                              | 82 (9)                    |                      |
| High school degree              | 68 (19)                             | 173 (18)                  |                      |
| Some college                    | 121 (33)                            | 279 (29)                  |                      |
| ≥College degree                 | 100 (27)                            | 286 (30)                  |                      |
| Missing, N (%)                  | 45 (12)                             | 127 (13)                  |                      |
| Occupational status, N (%)      |                                     |                           | 0.94                 |
| Not employed                    | 81 (22)                             | 211 (22)                  |                      |
| Employed                        | 239 (65)                            | 609 (64)                  |                      |

|                                       |            |            |      |
|---------------------------------------|------------|------------|------|
| Missing, N (%)                        | 45 (12)    | 127 (13)   |      |
| Marital status, N (%)                 |            |            | 0.42 |
| Not married                           | 177 (48)   | 431 (46)   |      |
| Married                               | 142 (39)   | 388 (41)   |      |
| Missing, N (%)                        | 46 (13)    | 128 (14)   |      |
| Age at delivery (years),<br>mean (SD) | 29 (6)     | 29 (6)     | 0.74 |
| Missing, N (%)                        | 71 (19)    | 99 (10)    |      |
| Asthma, N (%)                         | 67 (18)    | 160 (17)   | 0.64 |
| Missing, N (%)                        | 46 (13)    | 128 (14)   |      |
| Gestational diabetes, N<br>(%)        | 23 (6)     | 58 (6)     | 0.67 |
| Missing, N (%)                        | 71 (19)    | 100 (11)   |      |
| C-section, N (%)                      | 105 (29)   | 313 (33)   | 0.77 |
| Missing, N (%)                        | 71 (19)    | 99 (10)    |      |
| <b>Infant characteristics</b>         |            |            |      |
| Birth weight (grams),<br>mean (SD)    | 3225 (577) | 3204 (618) | 0.73 |
| Missing, N (%)                        | 71 (19)    | 99 (10)    |      |
| Gestational age<br>(weeks), mean (SD) | 38 (2)     | 38 (2)     | 0.86 |
| Missing, N (%)                        | 71 (19)    | 99 (10)    |      |
| Infant race, N (%)                    |            |            | 0.27 |

|                           |          |          |      |
|---------------------------|----------|----------|------|
| White                     | 195 (53) | 497 (52) |      |
| Black                     | 94 (26)  | 264 (28) |      |
| Other                     | 46 (13)  | 91 (10)  |      |
| Missing, N (%)            | 30 (8)   | 95 (10)  |      |
| Hispanic ethnicity, N (%) | 34 (9)   | 58 (10)  | 0.07 |
| Missing, N (%)            | 30 (8)   | 95 (10)  |      |
| Male sex, N (%)           | 137 (38) | 415 (44) | 0.53 |
| Missing, N (%)            | 71 (19)  | 99 (10)  |      |

---

SD, standard deviation.

\*P<0.05

<sup>a</sup>P-value for comparisons between cohorts calculated using Kruskal-Wallis or Pearson  $\chi^2$  test, as appropriate.
