# Supplementary material for: The Associations of Maternal Health Characteristics, Newborn Metabolite Concentrations, and Child Body Mass Index among US Children in the ECHO Program
Source: MDPI journal article supplement (doi:10.3390/metabo13040510), 2023-04-01
Supplement: s1 [file s1]

**Table S7. Additional maternal health characteristics of INSPIRE participants with linked newborn screening metabolic data (n=1920).**

| <b>Characteristic</b>                 |           |
|---------------------------------------|-----------|
| Prenatal stress exposure, N (%)       |           |
| No stressors                          | 1168 (61) |
| One stressor                          | 389 (20)  |
| Multiple stressors                    | 183 (10)  |
| Missing, N (%)                        | 180 (9)   |
| Social Vulnerability Index, mean (SD) |           |
| Missing, N (%)                        | 1 (0)     |
| Residence, N (%)                      |           |
| Urban                                 | 1450 (76) |
| Rural                                 | 453 (24)  |
| Missing, N (%)                        | 17 (1)    |
| Type of insurance coverage, N (%)     |           |
| Government                            | 1042 (54) |
| Private                               | 856 (45)  |
| Other                                 | 22 (1)    |
| Missing, N (%)                        | 0         |

SD, standard deviation.
