# Supplementary material for: The Associations of Maternal Health Characteristics, Newborn Metabolite Concentrations, and Child Body Mass Index among US Children in the ECHO Program
Source: Metabolites. 2023 Apr 1;13(4):510. doi: 10.3390/metabo13040510 (PMC10144800; doi:10.3390/metabo13040510)
Supplement: Supplementary file 1 [file metabolites-13-00510-s001.zip]

Archive with 19 entries (19 files):
- Figure_S1_panel_A.png
- Figure_S1_panel_B.png
- Figure_S1_panel_C.png
- Figure_S2.png
- Figure_S3.png
- Figure_S4.png
- Figure_S5.png
- Figure_S6_panel_A.png
- Figure_S6_panel_B.png
- Figure_S7.png
- Supplementary_Material- Clean.pdf
- Table S1.pdf
- Table S2.pdf
- Table S3.pdf
- Table S4.pdf
- Table S5.pdf
- Table S7.pdf
- Table_S6.xlsx
- Table_S8.xlsx
