# Supplementary material for: The Associations of Maternal Health Characteristics, Newborn Metabolite Concentrations, and Child Body Mass Index among US Children in the ECHO Program
Source: Metabolites. 2023 Apr 1;13(4):510. doi: 10.3390/metabo13040510 (PMC10144800; doi:10.3390/metabo13040510)
Supplement: Supplementary file 1 [file metabolites-13-00510-s001.zip › Table_S6.xlsx]

## Sheet: Sheet1
Table S6. Associations between maternal health characteristics and metabolite concentrations at birth in the discovery (n=2285) and replication (n=1207) cohorts.
	Prenatal smoking						Higher pre-pregnancy BMI						Lower education						Not married						Higher age at delivery						Asthma						Gestational diabetes						C-section						Not employed
	Discovery cohorts			Replication cohort			Discovery cohorts			Replication cohort			Discovery cohorts			Replication cohort			Discovery cohorts			Replication cohort			Discovery cohorts			Replication cohort			Discovery cohorts			Replication cohort			Discovery cohorts			Replication cohort			Discovery cohorts			Replication cohort			Discovery cohorts
Metabolite (umol/L)	β (95% CI)	aβ (95% CI)	Adjusted p-value	β (95% CI)	aβ (95% CI)	Adjusted p-value	β (95% CI)	aβ (95% CI)	Adjusted p-value	β (95% CI)	aβ (95% CI)	Adjusted p-value	β (95% CI)	aβ (95% CI)	Adjusted p-value	β (95% CI)	aβ (95% CI)	Adjusted p-value	β (95% CI)	aβ (95% CI)	Adjusted p-value	β (95% CI)	aβ (95% CI)	Adjusted p-value	β (95% CI)	aβ (95% CI)	Adjusted p-value	β (95% CI)	aβ (95% CI)	Adjusted p-value	β (95% CI)	aβ (95% CI)	Adjusted p-value	β (95% CI)	aβ (95% CI)	Adjusted p-value	β (95% CI)	aβ (95% CI)	Adjusted p-value	β (95% CI)	aβ (95% CI)	Adjusted p-value	β (95% CI)	aβ (95% CI)	Adjusted p-value	β (95% CI)	aβ (95% CI)	Adjusted p-value	β (95% CI)
Free carnitine (C0)	0.09 (0.05, 0.13)	0.04 (-0.004, 0.09)	0.07	0.06 (-0.01, 0.14)	0.04 (-0.03, 0.12)	0.26	0.05 (0.03, 0.07)	0.05 (0.03, 0.07)	2e-05	0.03 (0.0003, 0.06)	0.04 (0.006, 0.06)	0.02	0.04 (0.02, 0.06)	0.02 (-0.003, 0.04)	0.09	-0.01 (-0.03, 0.004)	-0.005 (-0.03, 0.02)	0.7	0.07 (0.04, 0.11)	0.05 (0.005, 0.09)	0.03	-0.02 (-0.06, 0.02)	0.03 (-0.03, 0.08)	0.35	-0.03 (-0.05, -0.0009)	-0.01 (-0.04, 0.02)	0.5	0.04 (0.01, 0.06)	0.05 (0.01, 0.08)	0.006	0.01 (-0.03, 0.05)	-0.007 (-0.05, 0.03)	0.73	-0.02 (-0.07, 0.03)	-0.03 (-0.09, 0.02)	0.23	0.05 (-0.02, 0.12)	0.02 (-0.05, 0.10)	0.51	0.05 (-0.06, 0.16)	0.03 (-0.08, 0.13)	0.63	0.04 (-0.0002, 0.08)	0.02 (-0.02, 0.06)	0.36	0.04 (-0.005, 0.09)	0.02 (-0.03, 0.07)	0.45	0.007 (-0.03, 0.04)
Short-chain acylcarnitines
Acetylcarnitine (C2)	NA	NA	NA	NA	NA	NA	NA	NA	NA	NA	NA	NA	NA	NA	NA	NA	NA	NA	NA	NA	NA	NA	NA	NA	0.04 (0.007, 0.07)	0.04 (0.003, 0.08)	0.03	0.04 (0.02, 0.06)	0.04 (0.02, 0.07)	0.0009	NA	NA	NA	NA	NA	NA	NA	NA	NA	NA	NA	NA	NA	NA	NA	NA	NA	NA	NA
Propionylcarnitine (C3)	NA	NA	NA	NA	NA	NA	NA	NA	NA	NA	NA	NA	NA	NA	NA	NA	NA	NA	NA	NA	NA	NA	NA	NA	0.05 (0.02, 0.09)	0.02 (-0.01, 0.06)	0.2	0.05 (0.03, 0.08)	0.05 (0.01, 0.09)	0.01	NA	NA	NA	NA	NA	NA	NA	NA	NA	NA	NA	NA	NA	NA	NA	NA	NA	NA	NA
Butyrylcarnitine+Isobutyrylcarnitine (C4)	NA	NA	NA	NA	NA	NA	NA	NA	NA	NA	NA	NA	NA	NA	NA	NA	NA	NA	NA	NA	NA	NA	NA	NA	0.01 (-0.01, 0.03)	0.005 (-0.02, 0.03)	0.75	0.01 (-0.02, 0.04)	0.02 (-0.03, 0.06)	0.51	NA	NA	NA	NA	NA	NA	NA	NA	NA	NA	NA	NA	NA	NA	NA	NA	NA	NA	NA
Isovalerylcarnitine + Methylbutyrylcarnitine (C5)	NA	NA	NA	NA	NA	NA	NA	NA	NA	NA	NA	NA	NA	NA	NA	NA	NA	NA	NA	NA	NA	NA	NA	NA	-0.01 (-0.04, 0.02)	0.02 (-0.007, 0.06)	0.12	-0.03 (-0.08, 0.02)	0.05 (-0.02, 0.11)	0.17	NA	NA	NA	NA	NA	NA	NA	NA	NA	NA	NA	NA	NA	NA	NA	NA	NA	NA	NA
Tiglylcarnitine (C5:1)a	0.91 (0.66, 1.25)	0.77 (0.53, 1.10)	0.15	0.94 (0.66, 1.35)	0.94 (0.64, 1.38)	0.76	1.04 (0.89, 1.21)	1.05 (0.89, 1.24)	0.55	0.99 (0.87, 1.14)	0.99 (0.86, 1.15)	0.93	1.07 (0.94, 1.22)	1.03 (0.86, 1.22)	0.75	0.98 (0.90, 1.08)	0.99 (0.86, 1.15)	0.92	1.09 (0.85, 1.40)	1.17 (0.86, 1.60)	0.33	0.96 (0.79, 1.18)	0.97 (0.74, 1.28)	0.85	0.92 (0.77, 1.09)	1.00 (0.80, 1.25)	1	1.06 (0.93, 1.21)	1.10 (0.93, 1.31)	0.28	0.84 (0.62, 1.13)	0.81 (0.59, 1.11)	0.19	1.11 (0.85, 1.45)	1.13 (0.86, 1.48)	0.39	0.99 (0.59, 1.66)	0.86 (0.50, 1.47)	0.58	1.21 (0.72, 2.02)	1.17 (0.69, 1.99)	0.55	1.12 (0.85, 1.46)	1.06 (0.80, 1.41)	0.67	0.98 (0.77, 1.25)	0.92 (0.72, 1.18)	0.53	1.48 (1.12, 1.94)
Medium-chain acylcarnitines
Hexanoylcarnitine (C6)	NA	NA	NA	NA	NA	NA	NA	NA	NA	NA	NA	NA	-0.02 (-0.04, -0.005)	-0.02 (-0.05, 0.0008)	0.06	-0.03 (-0.05, -0.009)	-0.01 (-0.04, 0.02)	0.42	NA	NA	NA	NA	NA	NA	NA	NA	NA	NA	NA	NA	NA	NA	NA	NA	NA	NA	NA	NA	NA	NA	NA	NA	NA	NA	NA	NA	NA	NA	NA
Octanoylcarnitine (C8)	NA	NA	NA	NA	NA	NA	NA	NA	NA	NA	NA	NA	-0.04 (-0.06, -0.02)	-0.01 (-0.04, 0.02)	0.3	-0.02 (-0.07, 0.02)	-0.002 (-0.07, 0.07)	0.96	NA	NA	NA	NA	NA	NA	NA	NA	NA	NA	NA	NA	NA	NA	NA	NA	NA	NA	NA	NA	NA	NA	NA	NA	NA	NA	NA	NA	NA	NA	NA
Decanoylcarnitine (C10)	NA	NA	NA	NA	NA	NA	NA	NA	NA	NA	NA	NA	-0.08 (-0.10, -0.06)	-0.05 (-0.07, -0.02)	0.0009	-0.02 (-0.05, 0.005)	-0.02 (-0.06, 0.02)	0.33	NA	NA	NA	NA	NA	NA	NA	NA	NA	NA	NA	NA	NA	NA	NA	NA	NA	NA	NA	NA	NA	NA	NA	NA	NA	NA	NA	NA	NA	NA	NA
Decenoylcarnitine (C10:1)	NA	NA	NA	NA	NA	NA	NA	NA	NA	NA	NA	NA	-0.007 (-0.02, 0.009)	-0.01 (-0.03, 0.008)	0.25	-0.004 (-0.05, 0.04)	0.04 (-0.03, 0.10)	0.29	NA	NA	NA	NA	NA	NA	NA	NA	NA	NA	NA	NA	NA	NA	NA	NA	NA	NA	NA	NA	NA	NA	NA	NA	NA	NA	NA	NA	NA	NA	NA
Decadienoylcarnitine (C10:2)a	1.36 (0.94, 1.97)	1.14 (0.74, 1.74)	0.56	1.05 (0.71, 1.54)	0.85 (0.57, 1.27)	0.43	1.26 (1.07, 1.49)	1.40 (1.18, 1.67)	0.0001	1.12 (0.97, 1.30)	1.11 (0.95, 1.29)	0.2	1.04 (0.90, 1.21)	0.94 (0.77, 1.15)	0.53	1.10 (1.00, 1.20)	1.06 (0.81, 1.40)	0.56	1.10 (0.83, 1.46)	1.26 (0.88, 1.81)	0.21	1.21 (0.99, 1.49)	1.05 (0.80, 1.39)	0.66	0.78 (0.63, 0.96)	0.91 (0.70, 1.18)	0.48	0.89 (0.78, 1.02)	0.97 (0.81, 1.16)	0.76	0.95 (0.67, 1.34)	0.91 (0.64, 1.30)	0.61	1.06 (0.81, 1.38)	1.00 (0.76, 1.31)	0.98	1.28 (0.70, 2.35)	1.26 (0.69, 2.29)	0.46	0.82 (0.50, 1.36)	0.72 (0.44, 1.18)	0.19	1.11 (0.81, 1.51)	1.05 (0.76, 1.46)	0.76	1.26 (0.98, 1.61)	1.20 (0.93, 1.55)	0.16	1.01 (0.74, 1.36)
Long-chain acylcarnitines
Tetradecanoylcarnitine (C14)	NA	NA	NA	NA	NA	NA	NA	NA	NA	NA	NA	NA	-0.05 (-0.07, -0.02)	-0.006 (-0.04, 0.02)	0.68	-0.04 (-0.06, -0.02)	-0.01 (-0.04, 0.02)	0.47	NA	NA	NA	NA	NA	NA	NA	NA	NA	NA	NA	NA	NA	NA	NA	NA	NA	NA	NA	NA	NA	NA	NA	NA	NA	NA	NA	NA	NA	NA	NA
3-Hydroxytetradecanoylcarnitine (C14-OH)a	0.52 (0.42, 0.65)	0.67 (0.52, 0.86)	0.002	0.93 (0.64, 1.36)	0.90 (0.61, 1.33)	0.59	0.99 (0.89, 1.09)	0.99 (0.89, 1.11)	0.91	1.07 (0.93, 1.22)	1.07 (0.92, 1.25)	0.35	0.71 (0.65, 0.77)	0.82 (0.74, 0.92)	0.0006	0.94 (0.86, 1.04)	0.94 (0.82, 1.08)	0.39	0.62 (0.53, 0.73)	0.87 (0.70, 1.06)	0.17	1.03 (0.84, 1.26)	1.19 (0.91, 1.55)	0.21	1.40 (1.25, 1.57)	1.09 (0.94, 1.26)	0.26	1.08 (0.95, 1.23)	1.07 (0.89, 1.27)	0.47	0.92 (0.76, 1.12)	0.98 (0.80, 1.20)	0.82	0.90 (0.69, 1.18)	0.87 (0.66, 1.14)	0.32	0.96 (0.70, 1.31)	0.86 (0.62, 1.20)	0.37	1.05 (0.62, 1.79)	1.02 (0.59, 1.76)	0.95	1.11 (0.94, 1.31)	1.07 (0.90, 1.28)	0.44	1.13 (0.88, 1.44)	1.10 (0.85, 1.42)	0.45	0.76 (0.64, 0.90)
Tetradecenoylcarnitine (C14:1)	NA	NA	NA	NA	NA	NA	NA	NA	NA	NA	NA	NA	-0.10 (-0.12, -0.08)	-0.05 (-0.08, -0.02)	0.0003	-0.04 (-0.06, -0.01)	-0.01 (-0.05, 0.02)	0.41	NA	NA	NA	NA	NA	NA	NA	NA	NA	NA	NA	NA	NA	NA	NA	NA	NA	NA	NA	NA	NA	NA	NA	NA	NA	NA	NA	NA	NA	NA	NA
Palmitoylcarnitine (C16)	NA	NA	NA	NA	NA	NA	NA	NA	NA	NA	NA	NA	-0.04 (-0.06, -0.02)	-0.01 (-0.04, 0.02)	0.38	-0.04 (-0.06, -0.03)	-0.02 (-0.05, 0.002)	0.07	NA	NA	NA	NA	NA	NA	NA	NA	NA	NA	NA	NA	NA	NA	NA	NA	NA	NA	NA	NA	NA	NA	NA	NA	NA	NA	NA	NA	NA	NA	NA
3-Hydroxypalmitoylcarnitine (C16-OH)a	0.48 (0.38, 0.59)	0.63 (0.49, 0.80)	0.0002	1.24 (0.85, 1.83)	1.12 (0.75, 1.68)	0.58	1.02 (0.93, 1.13)	1.03 (0.93, 1.14)	0.57	1.22 (1.06, 1.40)	1.24 (1.07, 1.45)	0.005	0.71 (0.65, 0.77)	0.84 (0.76, 0.94)	0.002	1.02 (0.93, 1.11)	0.93 (0.80, 1.07)	0.29	0.65 (0.56, 0.76)	0.90 (0.73, 1.10)	0.29	1.15 (0.94, 1.42)	1.17 (0.90, 1.53)	0.25	1.50 (1.33, 1.68)	1.20 (1.03, 1.38)	0.02	0.93 (0.81, 1.05)	0.89 (0.75, 1.06)	0.19	0.99 (0.81, 1.20)	1.04 (0.85, 1.27)	0.68	0.99 (0.75, 1.29)	0.92 (0.70, 1.21)	0.55	0.91 (0.67, 1.25)	0.79 (0.57, 1.10)	0.16	1.17 (0.71, 1.92)	1.10 (0.66, 1.83)	0.71	0.93 (0.79, 1.10)	0.86 (0.72, 1.02)	0.09	1.07 (0.84, 1.37)	1.05 (0.82, 1.36)	0.68	0.78 (0.66, 0.91)
Palmitoleylcarnitine (C16:1)	NA	NA	NA	NA	NA	NA	NA	NA	NA	NA	NA	NA	-0.07 (-0.10, -0.05)	-0.02 (-0.05, 0.02)	0.35	-0.05 (-0.07, -0.03)	-0.02 (-0.05, 0.005)	0.11	NA	NA	NA	NA	NA	NA	NA	NA	NA	NA	NA	NA	NA	NA	NA	NA	NA	NA	NA	NA	NA	NA	NA	NA	NA	NA	NA	NA	NA	NA	NA
Stearoylcarnitine (C18)	NA	NA	NA	NA	NA	NA	NA	NA	NA	NA	NA	NA	-0.008 (-0.03, 0.01)	0.00009 (-0.03, 0.03)	1	-0.01 (-0.04, 0.007)	-0.001 (-0.03, 0.03)	0.94	NA	NA	NA	NA	NA	NA	NA	NA	NA	NA	NA	NA	NA	NA	NA	NA	NA	NA	NA	NA	NA	NA	NA	NA	NA	NA	NA	NA	NA	NA	NA
Oleoylcarnitine (C18:1)	NA	NA	NA	NA	NA	NA	NA	NA	NA	NA	NA	NA	-0.005 (-0.02, 0.01)	0.01 (-0.01, 0.04)	0.3	-0.02 (-0.04, -0.002)	-0.01 (-0.05, 0.02)	0.37	NA	NA	NA	NA	NA	NA	NA	NA	NA	NA	NA	NA	NA	NA	NA	NA	NA	NA	NA	NA	NA	NA	NA	NA	NA	NA	NA	NA	NA	NA	NA
3-Hydroxyoleoylcarnitine (C18:1-OH)a	0.94 (0.76, 1.16)	1.07 (0.84, 1.36)	0.6	0.85 (0.57, 1.25)	0.78 (0.52, 1.17)	0.23	1.10 (0.99, 1.22)	1.12 (1.00, 1.25)	0.04	0.92 (0.80, 1.06)	0.96 (0.83, 1.12)	0.6	0.89 (0.81, 0.96)	0.94 (0.84, 1.05)	0.28	0.93 (0.85, 1.01)	0.93 (0.81, 1.07)	0.32	0.84 (0.71, 0.99)	0.93 (0.75, 1.14)	0.46	0.92 (0.75, 1.13)	0.93 (0.71, 1.22)	0.59	1.15 (1.03, 1.29)	1.05 (0.91, 1.20)	0.54	1.02 (0.90, 1.16)	0.96 (0.81, 1.14)	0.66	1.04 (0.84, 1.28)	1.04 (0.84, 1.29)	0.71	1.12 (0.86, 1.46)	1.13 (0.86, 1.49)	0.38	0.90 (0.64, 1.25)	0.84 (0.59, 1.19)	0.32	0.69 (0.42, 1.13)	0.70 (0.42, 1.16)	0.17	0.96 (0.81, 1.15)	0.92 (0.77, 1.11)	0.37	0.93 (0.73, 1.19)	0.92 (0.71, 1.19)	0.52	0.90 (0.76, 1.07)
Linoleoylcarnitine (C18:2)	NA	NA	NA	NA	NA	NA	NA	NA	NA	NA	NA	NA	0.11 (0.09, 0.13)	0.07 (0.05, 0.10)	8e-07	0.02 (-0.006, 0.05)	0.009 (-0.03, 0.05)	0.65	NA	NA	NA	NA	NA	NA	NA	NA	NA	NA	NA	NA	NA	NA	NA	NA	NA	NA	NA	NA	NA	NA	NA	NA	NA	NA	NA	NA	NA	NA	NA
Amino acids
Arginine (ARG)	NA	NA	NA	NA	NA	NA	NA	NA	NA	NA	NA	NA	NA	NA	NA	NA	NA	NA	NA	NA	NA	NA	NA	NA	NA	NA	NA	NA	NA	NA	NA	NA	NA	NA	NA	NA	NA	NA	NA	NA	NA	NA	NA	NA	NA	NA	NA	NA	NA
Argininosuccinate (ASA)	NA	NA	NA	--	--	--	NA	NA	NA	--	--	--	NA	NA	NA	--	--	--	NA	NA	NA	--	--	--	NA	NA	NA	--	--	--	NA	NA	NA	--	--	--	NA	NA	NA	--	--	--	NA	NA	NA	--	--	--	NA
Citrulline (CIT)	NA	NA	NA	NA	NA	NA	NA	NA	NA	NA	NA	NA	NA	NA	NA	NA	NA	NA	NA	NA	NA	NA	NA	NA	NA	NA	NA	NA	NA	NA	NA	NA	NA	NA	NA	NA	NA	NA	NA	NA	NA	NA	NA	NA	NA	NA	NA	NA	NA
Glycine (GLY)	NA	NA	NA	NA	NA	NA	NA	NA	NA	NA	NA	NA	NA	NA	NA	NA	NA	NA	NA	NA	NA	NA	NA	NA	NA	NA	NA	NA	NA	NA	NA	NA	NA	NA	NA	NA	NA	NA	NA	NA	NA	NA	NA	NA	NA	NA	NA	NA	NA
Leucine (LEU)	NA	NA	NA	--	--	--	NA	NA	NA	--	--	--	NA	NA	NA	--	--	--	NA	NA	NA	--	--	--	NA	NA	NA	--	--	--	NA	NA	NA	--	--	--	NA	NA	NA	--	--	--	NA	NA	NA	--	--	--	NA
Methionine (MET)	NA	NA	NA	NA	NA	NA	NA	NA	NA	NA	NA	NA	NA	NA	NA	NA	NA	NA	NA	NA	NA	NA	NA	NA	NA	NA	NA	NA	NA	NA	NA	NA	NA	NA	NA	NA	NA	NA	NA	NA	NA	NA	NA	NA	NA	NA	NA	NA	NA
Ornithine (ORN)	NA	NA	NA	NA	NA	NA	NA	NA	NA	NA	NA	NA	NA	NA	NA	NA	NA	NA	NA	NA	NA	NA	NA	NA	NA	NA	NA	NA	NA	NA	NA	NA	NA	NA	NA	NA	NA	NA	NA	NA	NA	NA	NA	NA	NA	NA	NA	NA	NA
Phenylalanine (PHE)	NA	NA	NA	NA	NA	NA	NA	NA	NA	NA	NA	NA	NA	NA	NA	NA	NA	NA	NA	NA	NA	NA	NA	NA	NA	NA	NA	NA	NA	NA	NA	NA	NA	NA	NA	NA	NA	NA	NA	NA	NA	NA	NA	NA	NA	NA	NA	NA	NA
Tyrosine (TYR)	NA	NA	NA	NA	NA	NA	NA	NA	NA	NA	NA	NA	NA	NA	NA	NA	NA	NA	NA	NA	NA	NA	NA	NA	NA	NA	NA	NA	NA	NA	NA	NA	NA	NA	NA	NA	NA	NA	NA	NA	NA	NA	NA	NA	NA	NA	NA	NA	NA
Valine (VAL)	NA	NA	NA	NA	NA	NA	NA	NA	NA	NA	NA	NA	NA	NA	NA	NA	NA	NA	NA	NA	NA	NA	NA	NA	NA	NA	NA	NA	NA	NA	NA	NA	NA	NA	NA	NA	NA	NA	NA	NA	NA	NA	NA	NA	NA	NA	NA	NA	NA
aData are expressed as odds ratio or adjusted odds ratio and 95% confidence interval (CI).
-- Metabolite not collected.
NA, association was not explored as the maternal health characteristic was not significantly associated with metabolite group in both the discovery and replication cohorts (analysis stage 1).
Adjusted point estimates were estimated for an 8.7-unit (interquartile range) increase in pre-pregnancy BMI, an 8-year increase in maternal age at delivery, and a 1-unit decrease in education. Adjusted beta estimates were calculated for metabolites with continuous distributions using multivariable linear regression. Adjusted odds ratios were calculated for metabolites with ordinal distributions u…
[truncated: 5 more columns]
