# Supplementary material for: The Associations of Maternal Health Characteristics, Newborn Metabolite Concentrations, and Child Body Mass Index among US Children in the ECHO Program
Source: Metabolites. 2023 Apr 1;13(4):510. doi: 10.3390/metabo13040510 (PMC10144800; doi:10.3390/metabo13040510)
Supplement: Supplementary file 1 [file metabolites-13-00510-s001.zip › Table_S8.xlsx]

## Sheet: Sheet1
Table S8. Associations between prenatal stress exposure, Social Vulnerability Index (SVI), type of insurance coverage, and residence and metabolite concentrations at birth in INSPIRE (n=1920).
	Prenatal stress exposure: One stressor vs. no stressors			Prenatal stress exposure: Multiple stressors vs. no stressors			SVI			Government insurance vs. private insurance			Other insurance vs. private insurance			Urban residence
Metabolite (umol/L)	β (95% CI)	aβ (95% CI)	Adjusted p-value	β (95% CI)	aβ (95% CI)	Adjusted p-value	β (95% CI)	aβ (95% CI)	Adjusted p-value	β (95% CI)	aβ (95% CI)	Adjusted p-value	β (95% CI)	aβ (95% CI)	Adjusted p-value	β (95% CI)	aβ (95% CI)	Adjusted p-value
Free carnitine (C0)	-0.03 (-0.07, 0.01)	-0.04 (-0.009, 0.06)	0.05	0.05 (-0.01, 0.11)	0.03 (-0.04, 0.09)	0.43	0.05 (0.02, 0.08)	0.03 (-0.009, 0.06)	0.14	0.07 (0.04, 0.11)	0.02 (-0.03, 0.08)	0.34	0.25 (0.08, 0.42)	0.21 (0.05, 0.38)	0.01	-0.09 (-0.13, -0.04)	-0.06 (-0.10, -0.01)	0.01
Short-chain acylcarnitines
Acetylcarnitine (C2)	NA	NA	NA	NA	NA	NA	NA	NA	NA	NA	NA	NA	NA	NA	NA	NA	NA	NA
Propionylcarnitine (C3)	NA	NA	NA	NA	NA	NA	NA	NA	NA	NA	NA	NA	NA	NA	NA	NA	NA	NA
Butyrylcarnitine+Isobutyrylcarnitine (C4)	NA	NA	NA	NA	NA	NA	NA	NA	NA	NA	NA	NA	NA	NA	NA	NA	NA	NA
Isovalerylcarnitine + Methylbutyrylcarnitine (C5)	NA	NA	NA	NA	NA	NA	NA	NA	NA	NA	NA	NA	NA	NA	NA	NA	NA	NA
Tiglylcarnitine (C5:1)a	1.03 (0.71, 1.50)	0.97 (0.66, 1.43)	0.89	0.75 (0.47, 1.20)	0.67 (0.42, 1.09)	0.11	1.03 (0.81, 1.32)	0.95 (0.72, 1.27)	0.75	1.17 (0.88, 1.56)	1.06 (0.70, 1.61)	0.78	1.19 (0.30, 4.66)	1.10 (0.27, 4.47)	0.89	1.07 (0.77, 1.48)	1.08 (0.75, 1.56)	0.67
Medium-chain acylcarnitines
Hexanoylcarnitine (C6)	NA	NA	NA	NA	NA	NA	NA	NA	NA	-0.04 (-0.08, 0.005)	-0.05 (-0.11, 0.01)	0.11	0.11 (-0.08, 0.30)	0.07 (-0.12, 0.27)	0.46	0.08 (0.04, 0.13)	0.06 (0.01, 0.11)	0.02
Octanoylcarnitine (C8)	NA	NA	NA	NA	NA	NA	NA	NA	NA	-0.09 (-0.13, -0.05)	-0.06 (-0.12, 0.0009)	0.05	0.14 (-0.05, 0.33)	0.14 (-0.05, 0.33)	0.16	0.06 (0.01, 0.11)	0.04 (-0.007, 0.09)	0.09
Decanoylcarnitine (C10)	NA	NA	NA	NA	NA	NA	NA	NA	NA	-0.15 (-0.19, -0.11)	-0.07 (-0.13, -0.004)	0.04	0.15 (-0.05, 0.36)	0.18 (-0.03, 0.38)	0.09	0.07 (0.02, 0.12)	0.05 (-0.003, 0.11)	0.06
Decenoylcarnitine (C10:1)	NA	NA	NA	NA	NA	NA	NA	NA	NA	-0.01 (-0.04, 0.02)	-0.02 (-0.06, 0.03)	0.41	0.05 (-0.10, 0.20)	0.02 (-0.13, 0.17)	0.78	0.004 (-0.03, 0.04)	0.01 (-0.03, 0.05)	0.61
Decadienoylcarnitine (C10:2)a	1.27 (0.83, 1.95)	1.26 (0.82, 1.94)	0.29	1.07 (0.58, 1.99)	0.97 (0.52, 1.83)	0.94	0.86 (0.64, 1.16)	0.80 (0.56, 1.12)	0.2	0.92 (0.65, 1.30)	0.84 (0.51, 1.40)	0.5	0.36 (0.08, 1.65)	0.40 (0.09, 1.85)	0.24	1.04 (0.69, 1.55)	1.28 (0.82, 1.99)	0.27
Long-chain acylcarnitines
Tetradecanoylcarnitine (C14)	NA	NA	NA	NA	NA	NA	-0.08 (-0.12, -0.04)	-0.02 (-0.07, 0.03)	0.49	-0.14 (-0.19, -0.09)	-0.08 (-0.16, -0.01)	0.02	-0.001 (-0.24, 0.23)	0.04 (-0.19, 0.28)	0.71	NA	NA	NA
3-Hydroxytetradecanoylcarnitine (C14-OH)a	0.98 (0.78, 1.22)	1.04 (0.83, 1.30)	0.71	1.02 (0.76, 1.37)	1.21 (0.89, 1.64)	0.23	0.69 (0.60, 0.80)	0.88 (0.74, 1.04)	0.14	0.54 (0.45, 0.64)	0.87 (0.67, 1.12)	0.29	0.93 (0.43, 2.02)	1.29 (0.58, 2.89)	0.53	1.53 (1.24, 1.87)	1.44 (1.15, 1.80)	0.001
Tetradecenoylcarnitine (C14:1)	NA	NA	NA	NA	NA	NA	-0.14 (-0.17, -0.10)	-0.05 (-0.09, -0.01)	0.01	-0.20 (-0.24, -0.15)	-0.05 (-0.11, 0.01)	0.14	-0.09 (-0.29, 0.12)	0.02 (-0.18, 0.22)	0.82	NA	NA	NA
Palmitoylcarnitine (C16)	NA	NA	NA	NA	NA	NA	-0.04 (-0.08, 0.001)	0.02 (-0.03, 0.07)	0.39	-0.10 (-0.15, -0.05)	-0.05 (-0.12, 0.02)	0.16	0.01 (-0.22, 0.24)	0.06 (-0.17, 0.29)	0.62	NA	NA	NA
3-Hydroxypalmitoylcarnitine (C16-OH)a	0.94 (0.76, 1.17)	1.00 (0.80, 1.24)	0.97	1.05 (0.79, 1.41)	1.30 (0.96, 1.76)	0.09	0.59 (0.51, 0.69)	0.72 (0.61, 0.86)	0.0002	0.49 (0.41, 0.59)	0.82 (0.64, 1.05)	0.12	0.93 (0.44, 1.95)	1.24 (0.57, 2.73)	0.58	1.63 (1.33, 1.99)	1.37 (1.10, 1.71)	0.004
Palmitoleylcarnitine (C16:1)	NA	NA	NA	NA	NA	NA	-0.11 (-0.16, -0.06)	0.008 (-0.05, 0.06)	0.77	-0.18 (-0.24, -0.12)	-0.04 (-0.12, 0.04)	0.31	-0.09 (-0.35, 0.18)	0.05 (-0.22, 0.32)	0.71	NA	NA	NA
Stearoylcarnitine (C18)	NA	NA	NA	NA	NA	NA	0.01 (-0.03, 0.06)	0.03 (-0.02, 0.08)	0.23	-0.02 (-0.07, 0.02)	-0.03 (-0.10, 0.04)	0.37	0.01 (-0.21, 0.23)	-0.0006 (-0.23, 0.22)	1	NA	NA	NA
Oleoylcarnitine (C18:1)	NA	NA	NA	NA	NA	NA	-0.0009 (-0.04, 0.03)	0.01 (-0.03, 0.05)	0.52	-0.01 (-0.05, 0.03)	0.007 (-0.05, 0.06)	0.82	-0.10 (-0.29, 0.08)	-0.09 (-0.28, 0.09)	0.33	NA	NA	NA
3-Hydroxyoleoylcarnitine (C18:1-OH)a	0.85 (0.68, 1.06)	0.87 (0.69, 1.08)	0.21	1.16 (0.85, 1.59)	1.25 (0.90, 1.72)	0.18	0.89 (0.76, 1.03)	0.96 (0.81, 1.15)	0.69	0.80 (0.67, 0.95)	0.95 (0.74, 1.24)	0.73	0.87 (0.37, 2.01)	1.03 (0.44, 2.42)	0.95	0.93 (0.76, 1.14)	0.89 (0.71, 1.12)	0.33
Linoleoylcarnitine (C18:2)	NA	NA	NA	NA	NA	NA	0.15 (0.11, 0.20)	0.07 (0.02, 0.12)	0.007	0.19 (0.14, 0.24)	0.01 (-0.06, 0.08)	0.72	0.02 (-0.22, 0.26)	-0.11 (-0.34, 0.13)	0.36	NA	NA	NA
Amino acids
Arginine	NA	NA	NA	NA	NA	NA	0.06 (0.002, 0.12)	0.07 (-0.001, 0.14)	0.05	NA	NA	NA	NA	NA	NA	NA	NA	NA
Argininosuccinate	NA	NA	NA	NA	NA	NA	0.001 (-0.03, 0.03)	0.003 (-0.03, 0.04)	0.89	NA	NA	NA	NA	NA	NA	NA	NA	NA
Citrulline	NA	NA	NA	NA	NA	NA	0.007 (-0.05, 0.06)	0.02 (-0.04, 0.08)	0.44	NA	NA	NA	NA	NA	NA	NA	NA	NA
Glycine	NA	NA	NA	NA	NA	NA	0.005 (-0.02, 0.03)	0.006 (-0.02, 0.03)	0.63	NA	NA	NA	NA	NA	NA	NA	NA	NA
Leucine	NA	NA	NA	NA	NA	NA	0.03 (0.01, 0.06)	0.02 (-0.005, 0.04)	0.12	NA	NA	NA	NA	NA	NA	NA	NA	NA
Methionine	NA	NA	NA	NA	NA	NA	0.04 (0.02, 0.06)	0.01 (-0.01, 0.03)	0.39	NA	NA	NA	NA	NA	NA	NA	NA	NA
Ornithine	NA	NA	NA	NA	NA	NA	-0.005 (-0.03, 0.02)	-0.005 (-0.04, 0.03)	0.75	NA	NA	NA	NA	NA	NA	NA	NA	NA
Phenylalanine	NA	NA	NA	NA	NA	NA	-0.02 (-0.06, 0.03)	0.01 (-0.04, 0.06)	0.7	NA	NA	NA	NA	NA	NA	NA	NA	NA
Tyrosine	NA	NA	NA	NA	NA	NA	-0.03 (-0.07, 0.01)	0.004 (-0.04, 0.05)	0.85	NA	NA	NA	NA	NA	NA	NA	NA	NA
Valine	NA	NA	NA	NA	NA	NA	0.001 (-0.02, 0.02)	0.02 (-0.009, 0.05)	0.19	NA	NA	NA	NA	NA	NA	NA	NA	NA
aData are expressed as odds ratio or adjusted odds ratio and 95% confidence interval (CI).
NA, association was not explored as the maternal health characteristic was not significantly associated with metabolite group in analysis stage 1.
Adjusted point estimates were estimated for a 0.51-unit (interquartile range) increase in SVI. Adjusted beta estimates were calculated for metabolites with continuous distributions using multivariable linear regression. Adjusted odds ratios were calculated for metabolites with ordinal distributions using proportional odds regression. Regression models were adjusted for cohort (discovery phase onl…
